1 **Occurrence of marine sponge *Chelonaplysilla delicata* Pulitzer-Finali & Pronzato, 1999 (Porifera:**  
2 **Demospongiae: Darwinellidae) from the Andaman Islands and the Indian Ocean: An indication**  
3 **of unexplored sessile habitat on mesophotic shipwrecks**

4 Rocktim Ramen Das<sup>1,3\*</sup>, Titus Immanuel<sup>1</sup>, Raj Kiran Lakra<sup>1</sup>, Karan Baath<sup>1</sup> and Ganesh  
5 Thiruchitrabalam<sup>1</sup>

6 <sup>1</sup>Department of Ocean Studies and Marine Biology, Pondicherry University, Brookshabad, Andaman  
7 Islands, India; <sup>2</sup>Infinity Scuba Andaman's, Chidiyatapu, Andaman Islands, India; <sup>3</sup>Graduate School of  
8 Engineering and Science, University of the Ryukyus, Nishihara, Okinawa, Japan.

9 Corresponding author: Rocktim Ramen Das; Email: k188604@cs.u-ryukyu.ac.jp

10 Titus Immanuel: titusimmanuel@gmail.com

11 Raj Kiran Lakra: rajkiranlakra@gmail.com

12 Karan Baath: karan123divewithme@gmail.com

13 T. Ganesh: tganesh.es@gmail.com

14

15

16

17

18

19

20 **Occurrence of marine sponge *Chelonaplysilla delicata* Pulitzer-Finali & Pronzato, 1999 (Porifera:**  
21 **Demospongiae: Darwinellidae) from the Andaman Islands and the Indian Ocean: An indication**  
22 **of unexplored sessile habitat on mesophotic shipwrecks**

23 Rocktim Ramen Das<sup>1,3\*</sup>, Titus Immanuel<sup>1</sup>, Raj Kiran Lakra<sup>1</sup>, Karan Baath<sup>1</sup> and Ganesh  
24 Thiruchitrambalam<sup>1</sup>

25 <sup>1</sup>Department of Ocean Studies and Marine Biology, Pondicherry University, Brookshabad, Andaman  
26 Islands, India; <sup>2</sup>Infinity Scuba Andaman's, Chidiyatapu, Andaman Islands, India; <sup>3</sup>Graduate School of  
27 Engineering and Science, University of the Ryukyus, Nishihara, Okinawa, Japan.

28 Corresponding author: Rocktim Ramen Das; Email: k188604@cs.u-ryukyu.ac.jp

29 **Abstract**

30 During a biodiversity assessment on an upper mesophotic artificial reef of Andaman and Nicobar  
31 Islands (Shipwreck: HMIS Sophie Marie/HMIS SM), a single specimen of sponge *Chelonaplysilla*  
32 *delicata* was recorded. Our finding confirms the species taxonomy and highlights the current  
33 observation as a first report from the Andaman and Nicobar Islands and the Indian Ocean. Further  
34 indicating the significance of old sunken structures surrounding the islands.

35 **Keywords:** *Chelonaplysilla delicata*, Indian Ocean, Biodiversity, Porifera, Andaman and Nicobar  
36 Islands

37 **Introduction**

38 The Andaman and Nicobar Islands (ANI) (Figure 1) is an archipelago that lies in the eastern  
39 side of Bay of Bengal, bounded by the Andaman Sea on the west<sup>1</sup>. These islands support a diverse

40 coral reef ecosystem that harbours a plethora of marine organisms<sup>2</sup>. Most faunal groups that have been  
41 studied extensively in these waters are large-sized, conspicuous and are of economic importance<sup>3</sup>  
42 however, areas in the mesophotic depths remain poorly explored. The study of sponge distribution in  
43 the islands, though have existed since the early 19<sup>th</sup> century<sup>4-11</sup>, numerous recent works have revealed  
44 many undocumented and new species<sup>12-19</sup> indicating its high diversity.

45 The coastal and offshore waters of ANI consist of a number of shipwrecks both in the shallow  
46 and mesophotic zones. These sunken structures act as an artificial reef providing space for growth and  
47 establishment of various sessile marine communities creating a habitat intricacy<sup>20-22</sup>. Being a dominant  
48 group in shipwreck driven ecosystem, poriferans are capable of colonizing in a relatively short period<sup>20,</sup>  
49 <sup>23-27</sup>. Although globally numerous studies have been conducted on these environments, shipwrecks  
50 remain less studied in the mesophotic zones (F. Sinniger pers comm). However, recent attempts to  
51 explore shallow wrecks has revealed interesting results<sup>22, 28-31</sup>.

52  
53 Our findings document the presence of the marine sponge *Chelonaplysilla delicata* from the  
54 Andaman and Nicobar Islands and the Indian Ocean and highlights the need to explore the rich  
55 unexplored fauna of mesophotic shipwrecks.

## 56 **Materials and Methods**

57 The sponge *C.delicata* (Figure 2), collected from the shipwreck HMIS SM (Figure 2, 3)  
58 during a survey conducted for documenting epifaunal diversity from February to March 2014. The  
59 shipwreck is a 70m long Royal Indian navy minesweeper that sank in the year of 1942 (Figure 3). At a  
60 depth of  $\approx 33$  meters, the wreck lies at the edge of the Macpherson strait near Chidiyatapu  
61 ( $11^{\circ}28'38.02''N$   $92^{\circ}42'12.20''E$ ), the southernmost tip of South Andaman Island (Fig. 1). Water  
62 transparency and temperature were recorded with Secchi disc and dive calculator. Within 2 hours after

63 collection, the specimen was preserved in 100% ethanol. A surface peel of the easily separable cortex  
64 of the specimen was removed and placed in xylene for 24 hours after which a permanent slide of the  
65 peel was mounted with DPX. A single fibre with its base and branches intact was removed from the  
66 sponge for species-level identification under a stereo microscope. (Figure 2B - D). The specimen was  
67 identified following Finali and Pronzato<sup>32</sup>. The preserved specimen is deposited in the National  
68 Zoological Collections (NZC) of the Andaman and Nicobar Regional Centre (ANRC), Zoological  
69 Survey of India (ZSI), Port Blair. Study maps were created using QGIS.

## 70 **Results**

### 71 Taxonomy and Description

72 Phylum: Porifera

73 Class: Demospongiae

74 Subclass: Keratosa

75 Order: Dendroceratida

76 Family: Darwinellidae

77 Genus: *Chelonaplysilla*

78 Species: *C. delicata* Pulitzer-Finali & Pronzato, 1999

79 Materials Examined: 1 ex (Paratype), ZSI/ANRC – 14321, India: Andaman Island: South  
80 Andaman: Chidiyatapu (11°28'38.02"N 92°42'12.20"E). Coll. RRD, 2014

81 Description: *C.delicata* predominantly thickly encrusting (< 10 mm) but has erect lobes that are  
82 about 4 - 5 cm high. The sponge surface is conulose, and the acute conules separated from each other  
83 by 2 - 5 mm. Oscules 1 - 3 mm in diameter, flush with the surface and unevenly distributed all over on  
84 sponge surface. The texture is soft collapsible and feeble. The fresh specimen was dark violet or purple  
85 in colour and retained its colour even in the preserved condition. Sponge surface covered by structured  
86 regular reticulation of sand and spicule detritus, which forms regular roundish or oval meshes of 90 -  
87 155 µm. This reticulation is typical of the genus. Regular rounded fibrous pores, inhalant in nature are  
88 enclosed within these rounded meshes (Figure 2D). The skeleton is dendritic, made up of pigmented  
89 fibres fragile in nature with repeated branching that originate from a basal spongin plate (Fig. 4B and  
90 4C) and extends towards the boundary. The primary fibre measured to be around 0.4 mm at its thickest.  
91 Spicules are absent.

92 Distribution: India: ANI (South Andman, Present study). Elsewhere: Bismark Sea (Papua New  
93 Guinea)<sup>32</sup>, Indonesia (Sulawesi)<sup>33</sup>, Palau<sup>34</sup>, French Polynesia<sup>35</sup>.

94 Similar Species: *C.delicata* is very similar to *C.erecta*<sup>36</sup>; however, the latter has fibres  
95 anastomosing in nature whereas the thickness of fibres in *C.delicata* fades in diameter. Our specimen  
96 was initially identified as *C.erecta*<sup>29</sup>.

97 Remarks: The specimen mentioned in Finali and Pronzato<sup>32</sup> is gray whereas our specimen in  
98 dark maroon in live condition.

99 Comments: The family Darwinellidae possesses sponging fibres with proper skeleton and  
100 fibrous spicules<sup>37,38</sup>. It consists of four recognized genus and forty-seven accepted species (one under  
101 “nomen nudum” status). *Chelonaplysilla* is the only genus, which is devoid of spicules but consists of a  
102 fibrous dendritic skeleton that possesses distinct laminated bark surrounding a central pith region. A

103 structured and separable cortex that is reinforced by a delicate reticulation of sand grains<sup>38</sup>  
104 distinguishes this genus.

105 Wreck Biodiversity: The surface of the wreck surveyed consisted of various sessile  
106 communities<sup>31</sup>, revised identification of which revealed the presence of encrusting Sponges, Tunicates,  
107 Bryozoans, and Hydroids. Ahermatypic corals of family Dendrophylliidae (*Tubastrea*) were common  
108 and easily visible (Figure 3). Solitary corals (*Heterocyathus*) were scattered in few vertical areas. Reef-  
109 building corals were relatively less in abundance. The observed corals include *Favia*, *Symphyllia*,  
110 *Podabacia crustacea*, and *Leptoseris*. A Gastropod (*Chicoreus* sp.) and few Crinoids were also present.  
111 Poriferan families which were identified during the survey include Irciniidae (*Ircinia*), Chalinidae  
112 (*Haliclona (Reniera)*); Thorectidae (*Hyrtios*), Iotrochotidae (*Iotrochota baculifera*), Thorectidae  
113 (*Dactylospongia*). Tunicates comprised of Didemnidae (*Didemnum*), Perophoridae (*Perophora*) and  
114 other unidentified sp. Macroalgae were absent however areas covered with a mix of turf algae and  
115 encrusting crustose algae (ECA). The mean temperature in the area was 26.5° C.

## 116 Discussion

117 The Faunal organisms that thrives in Artificial Reefs (Shipwrecks) is an important part of the  
118 marine community<sup>27,39</sup>. With increasing anthropogenic impacts on natural coral reef habitats, artificial  
119 reefs are regarded as a successful alternative<sup>25</sup>. As a result, it becomes important to understand the  
120 biological communities growing on these habitats<sup>26</sup>. Since a stable structural feature can lead a  
121 centennial shipwreck to mimic a natural coral reef ecosystem<sup>39,40</sup>, the necessity to investigate pre-  
122 existing shipwrecks in a mesophotic zone can provide insights on these complex ecosystems. The  
123 faunal assemblages in shipwrecks vary with horizontal and vertical orientation<sup>39</sup>. Such assemblages  
124 enhance food resources for fishes, increasing its abundance thus improving diversity<sup>20</sup>. Sponges which  
125 naturally occupy shipwrecks are one of the dominant organisms in such habitat, as evidenced by many

126 studies<sup>20,21,26,27,41,42</sup>. Their presence in large numbers also signifies advance stages of community  
127 succession<sup>20,43</sup>. Sponges are known to play an important role in ecological recycling, habitat formation  
128 for other organisms, acting as functional connectors between the benthic community and ocean  
129 productivity and are also known to replace corals<sup>44,45</sup>.

130 Environmental parameters like depth and light penetration play an important role in the  
131 distribution and presence of communities in a shipwreck<sup>20,39</sup>. Lower light intensity in the study area can  
132 contribute towards the abundance of poriferans and ahermatypic corals (*Tubastrea* sp.) (Figure 1), by  
133 limiting macroalgal growth<sup>31,39</sup>. Yogesh-Kumar et al.<sup>30</sup> reported high sponge cover when studying  
134 other wrecks in the region; however, the live coral coverage remains contrasting, indicating the role of  
135 regional stressors and geolocation. Sponges that inhabit mesophotic areas mainly rely on plankton  
136 feeding rather than photosymbionts and have higher growth rates due to the limited light intensity<sup>45,46</sup>.  
137 In the Caribbean's, sponge density seems to be directly proportional to depth<sup>44</sup>. Moreover, the  
138 difference in current velocities affects the growth and development of filter feeders like sponges  
139 present in the shipwrecks<sup>39</sup>. Higher current velocities through the Macpherson strait (Figure 1) can  
140 effectively determine the faunal assemblage of HMIS SM but a long-term monitoring is necessary in  
141 this regard.

142 The occurrence of a sponge from the deepest (Upper mesophotic region) and oldest wreck  
143 (WWII) studied in the area sheds light on the vast and rich biodiversity that thrives on such habitats  
144 and awaits much-needed attention from the scientific community. Technical gaps have always been a  
145 hurdle to study mesophotic ecosystems but with the advancement of time, technologies like automated  
146 underwater vehicle (AUV), remotely operated underwater vehicle (ROV), submersible's etc. can be  
147 well utilized for the exploration of shipwrecks in such depths. It should be noted that the recent use of  
148 ROV in ANI (see. Ramesh et al.<sup>47</sup>) and the documentation of Mesophotic reefs off Puducherry coast<sup>48</sup>

149 is an important step that will further lead towards the exploration of deeper ecosystems in the region.  
150 Further, as only certain areas of the wreck were assessed, long-term repeated sampling, taking  
151 structural heterogeneity, hydrodynamics, and other environmental parameters into account will possibly  
152 give a detailed picture of the faunal assemblages.

## 153 **Acknowledgements**

154 The authors thank Dr. P.M Mohan Former HOD, DOSMB, Pondicherry University, Mr. G. Sakthivel  
155 for providing information on HMIS SM. RRD acknowledges critical comments by Dr. K.  
156 Wangkulangkul (PSU, Thailand) on the initial draft, to Dr. F. Sinniger (University of the Ryukyus,  
157 Japan) for providing valuable insights on the mesophotic ecosystem.

## 158 **References**

- 159 1. Ubare, V.U. and Mohan, P.M., New Records and Range Extensions of Some Marine Sponges  
160 (Porifera: Demospongiae and Homoscleromorpha) from the Andaman Islands, India; Part of the  
161 Indo-Burma Biodiversity Hotspot. *Zool. Stud.*, 2018, DOI:10.6620/ZS.2018.57-03
- 162 2. Venkataraman K, *et al.*, 2012. Scleractinia of Andaman and Nicobar Islands. Kolkata:  
163 Zoological Survey of India.
- 164 3. Venkataraman, K. and Wafar, M., Coastal and Marine Biodiversity of India. *Indian J.*  
165 *Geomarine Sci.*, 2005, **34**(1): 57-75.
- 166 4. Schulze FE. 1902. An account of the Indian Triaxonia collected from the Royal Indian marine  
167 survey ship "Investigator" translated into English by R. von Lendenfeld. Trustees of the Indian  
168 museum, Calcutta, pp. 1-113
- 169 5. Schulze FE. 1904. Hexactinellida. Vol. 4 of the Wissenschaftliche Ergebnisse der Deutschen  
170 Tiefsee-Expedition auf dem Dampfer "Valdivia" 1898-1899.



- 171 6. Dendy A. 1905. Report on the sponges collected by Professor Herdman at Ceylon in 1902.  
172 Ceylon Pearl Oyster Fisheries, Supplementary reports Royal Society London **XVIII**: 57-246.
- 173 7. Annandale, N., Indian Boring Sponges of the Family Clionidae. *Rec. Indian Museum*, 1915, **11**:  
174 1-24.
- 175 8. Dendy A, Burton M. 1926. Report on Some Deep-Sea Sponges from the Indian Museum  
176 Collected by the R.I.M.S. 'Investigator'. Part I. Hexactinellida and Tetractinellida (PARS.). *Rec*  
177 *Indian Museum* **28**(4): 225-248.
- 178 9. Burton, M. and Rao, H.S., Report on the Shallow-Water Marine Sponges in the Collection of  
179 the Indian Museum. Part I. *Rec. Indian Museum*, 1932, **XXXXIV**: 299-358.
- 180 10. Burton M. 1937. Supplement to The Littoral Fauna of Krusadai Island in the Gulf of Manaar:  
181 Porifera. 2 vols. Calcutta: Government Press.
- 182 11. Rao H. S. 1941. Indian and Ceylon Sponges in the Naturalistoriska Riksmuseet, Stockholm,  
183 collected by K. Fistedt. *Rec Indian Museum* **XLIII**: 417–496.
- 184 12. Pattanayak JG. 2006. Marine Sponges of Andaman and Nicobar Islands, India. *Rec Zool*  
185 *Surv India* **255**: 1–152.
- 186 13. Vinod K, *et al.*, 2007. An Account of Hexactinellid Sponge, *Hyalonema (Cyliconema) apertum*  
187 *apertum* Collected from Andaman Waters. *JMBAI* **49**(2): 219-225.
- 188 14. Vinod K, *et al.*, 2012. *Semperella megaloxea* sp. nov. (Family: Pheronematidae): A new  
189 hexactinellid sponge from Andaman waters, India. *Indian J Fish* **59**: 33-36
- 190 15. Immanuel T, Raghunathan C. 2011. First Record of the Sponge *Damiria toxifera*  
191 (Poecilosclerida: Acarnidae) from the Andaman Sea, Andaman and Nicobar Islands. *Mar*  
192 *Biodivers Rec* **4**: e32.

- 193 16. Immanuel T, *et al.*, 2014. An Updated Report on the Diversity of Marine Sponges of the  
194 Andaman and Nicobar Islands. *In*: Venkataraman K, Sivaperuman C. (eds.) Marine Faunal  
195 Diversity in India: Taxonomy, Ecology and Conservation, Elseiver, pp. 3-13.
- 196 17. Immanuel T, *et al.*, 2016. New Records of *Chondrilla australiensis* and *Chondrilla*  
197 *grandistellata* (Demospongiae: Chondrosida: Chondrillidae) from Havelock Island, South  
198 Andaman, India. *J Threat Taxa* **7**(14): 8167-8172.
- 199 18. Ubare VU, Mohan PM. 2016. A New Species of Genus *Plakortis* Schulze 1880 (Porifera:  
200 Homoscleromorpha) from Badabalu, Andaman and Nicobar Islands, India. *Zool Stud* **55**(2):  
201 doi:10.6620/ZS.2016.55-02
- 202 19. Periera P, Raghunathan C. 2018. Diversity of sponges in Marine protected areas of North  
203 Andaman, India. *Thalassas*. <https://doi.org/10.1007/s41208-018-0073-2>
- 204 20. Walker SJ, *et al.*, 2007. Spatial Heterogeneity of Epibenthos on Artificial Reefs: Fouling  
205 Communities in the Early Stages of Colonization on an East Australian Shipwreck. *Marine*  
206 *Ecology* **28**: 435-445.
- 207 21. Lira SMA, *et al.*, 2010. Sessile and Sedentary Macrofauna from the Pirapama Shipwreck,  
208 Pernambuco, Brazil. *Biota Neotrop* **10**(9): 155-165.
- 209 22. Mondal T, Raghunathan C. 2017. Shipwrecks in Andaman and Nicobar Islands: An Artificial  
210 Habitat for Corals. *JMBAI* **59**(2): 92-101.
- 211 23. Aseltine-Neilson DA, *et al.*, 1999. Comparisons of Turf Communities from Pendleton Artificial  
212 Reef, Torrey Pines Artificial Reef, and a Natural Reef using Multivariate Techniques. *Bull Mar*  
213 *Sci* **65**(1): 37-57.
- 214 24. Clark S, Edwards AJ. 1999. An Evaluation of Artificial Reef Structures as Tools for Marine  
215 Habitat Rehabilitation in the Maldives. *Aquat Conserv* **9**(1): 5-21.

- 216 25. Perkol-Finkel S, Benayahu Y. 2005. Recruitment of Benthic Organisms onto a Planned  
217 Artificial Reef: Shifts in Community Structure One Decade Post Deployment. *Mar Environ*  
218 *Res* **59**(2): 79–99.
- 219 26. Thanner SE, *et al.*, 2006. Development of Benthic and Fish Assemblages on Artificial Reef  
220 Materials Compared to Adjacent Natural Reef Assemblages in Miami-Dade County,  
221 Florida. *Bull Mar Sci* **78**(1): 57-70.
- 222 27. Amaral FMD, *et al.*, . 2009/2010. Benthic Macrofauna Inventory of Two Shipwrecks from  
223 Pernambuco Coast, Northeastern of Brazil. *Revista Nordestina de Zoologia-Recife* **4**(1): 24-41.
- 224 28. Hema M. 2013. Fish Assemblage on Artificial Reef and Natural Reef (A Comparative Study).  
225 MSc Dissertation, Department of Ocean Studies and Marine Biology, Pondicherry University.
- 226 29. Das RR. 2014. An Inventory of Benthic Macrofauna from Two Shipwrecks along the Coast of  
227 South Andaman. MSc Dissertation, Department of Ocean Studies and Marine Biology,  
228 Pondicherry University.
- 229 30. Yogesh Kumar JS, *et al.*, 2015. An Assessment of Faunal Diversity and its conservation of  
230 shipwrecks in Indian seas. *In: Venkataraman K, Sivaperuman C (eds.) Marine Faunal Diversity*  
231 *in India: Taxonomy, Ecology and Conservation*, 441-450 USA: Elseiver, pp. 441-450.
- 232 31. Das RR, *et al.*, 2016. A preliminary macrobenthic study of world war two era wrecks along the  
233 coast of South Andaman. *In: Bijukumar A, Pradeep NS, Ajit Kumar KG, Rajendran PG. (eds.)*  
234 *Perspectives on Biodiversity of India, Centre for Innovation in Science & Social Action*  
235 *(CISSA)*, pp. 83-92.
- 236 32. Pulitzer-Finali G, Pronzato R. 1999. Horny Sponges from the North-Eastern Coast of Papua  
237 New Guinea, Bismark Sea. *J Mar Biol Assoc U.K.* **79**(4): 593-607.
- 238 33. GBIF 2000

- 239 34. Ridley CP, *et al.*, 2005. Speciation and Biosynthetic variation in four dictyoceratid sponges and  
240 their cyanobacterial symbiont, *Oscillatoria spongelliae*. *Chemistry and Biology* **12**: 397-406.
- 241 35. Hall KA, *et al.*, 2017. *Sponges of Polynesia. Papeete (PYF): IRD. pp. 827.*
- 242 36. Tsumamal M. 1967. *Chelonaplysilla erecta* n. sp. (Demospongiae, Keratosa) from  
243 Mediterranean Coast of Israel. *Isr J Zool* **16**(2): 96-100.
- 244 37. Van Soest RWM. 1978. Marine Sponges from Curaçao and Other Caribbean localities Part I.  
245 Keratosa. Studies on the Fauna of Curaçao and Other Caribbean Islands **56**(1): 1-94.
- 246 38. Bergquist PR, Cook SC. 2002. Family Darwinellidae Merejkowsky, 1879. In: Hooper JNA,  
247 Van-Soest RWM. (eds.) *Systema Porifera: A guide to the classification of Sponges*, New York:  
248 Springer, pp. 1068-1071.
- 249 39. Zintzen V, *et al.*, 2006. Epifaunal inventory of two shipwrecks from the Belgian Continental  
250 Shelf. *Hydrobiologia* **555**(1): 207-219.
- 251 40. Perkol-Finkel S, *et al.*, 2006. Can Artificial Reefs Mimic Natural Reef Communities? The  
252 Roles of Structural Features and Age. *Mar Environ Res* **61**(2): 121-135.
- 253 41. Diaz MC, Rützler K. 2001. Sponges: An Essential Component of Caribbean Coral Reefs. *Bull*  
254 *Mar Sci* **69**(2): 535-546.
- 255 42. Cedro VR, *et al.*, 2007. Demospongiae (Porifera) of the shallow coral reefs of Maceió, Alagoas  
256 State, Brazil. In: Custódio MR, Lôbo-Hajdu G, Muricy G. (eds.) *Porifera research biodiversity,*  
257 *innovation and sustainability*, Rio de Janeiro: Museu Nacional, pp. 233-237.
- 258 43. Roberts DE, *et al.*, 2006. Structure and Dynamics of Sponge-Dominated Assemblages on  
259 Exposed and Sheltered Temperate Reefs. *Mar Ecol Prog Ser* **321**: 19–30.
- 260 44. Lesser MP, Slattery M. 2013. Ecology of Caribbean Sponges: are Top-Down or Bottom-Up  
261 Processes more Important?. *PloS one* **8**(11): e79799.

- 262 45. Sinniger F, *et al.*, 2016. Biodiversity of mesophotic coral ecosystems. *In*: Baker EK, Puglise  
263 KA, Harris PT. (eds.) Mesophotic coral ecosystems A lifeboat for coral reefs.?, Arendal and  
264 Nairobi: UNEP and GRID, pp. 50-58.
- 265 46. Baker E, *et al.*, 2016. What are mesophotic coral ecosystems.? *In*: Baker EK, Puglise KA,  
266 Harris PT (eds.) Mesophotic coral ecosystems A lifeboat for coral reefs.?, Arendal and Nairobi:  
267 UNEP and GRID, pp. 11-19.
- 268 47. Ramesh S, *et al.*, 2017. Application of Indigenously developed Remotely Operated Vehicle for  
269 the study of Driving Parameters of Coral Reef Habitat of South Andaman Islands, India. *Curr*  
270 *Sci* doi: 10.18520/cs/v113/i12/2353-2359.
- 271 48. Laxmilatha P, Jasmine S, Sreeram MP, Rengaiyan P. 2019. Benthic communities of mesophotic  
272 coral ecosystem off Puducherry east coast of India. *Curr Sci* doi: 10.18520/cs/v116/i6/982-987.
- 273
- 274
- 275

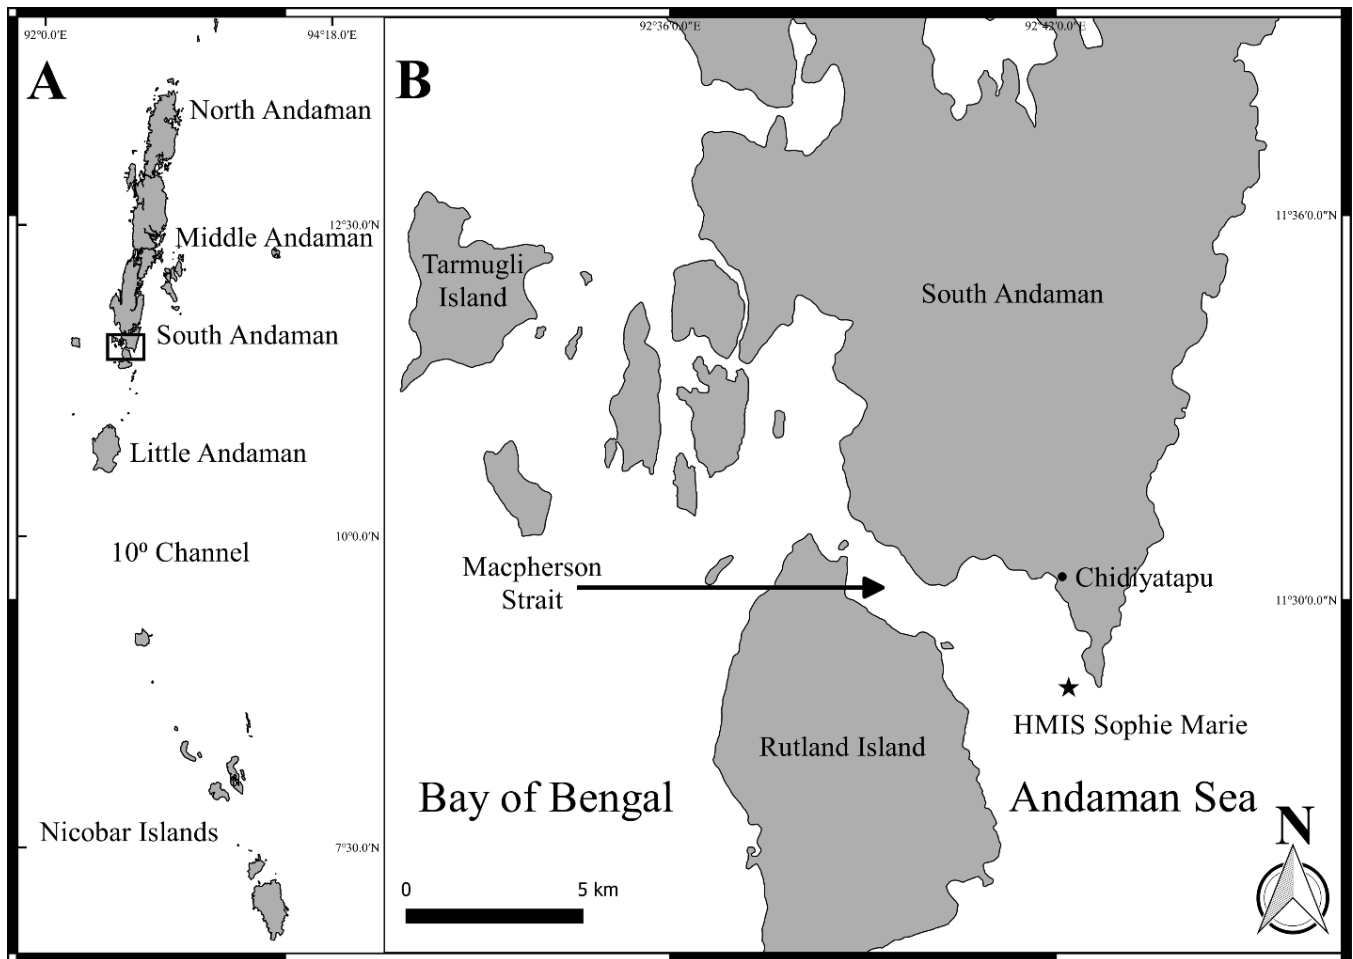

276

277 **Figure 1.** Location of the study area (HMIS SM). (A) ANI, (B) South Andaman

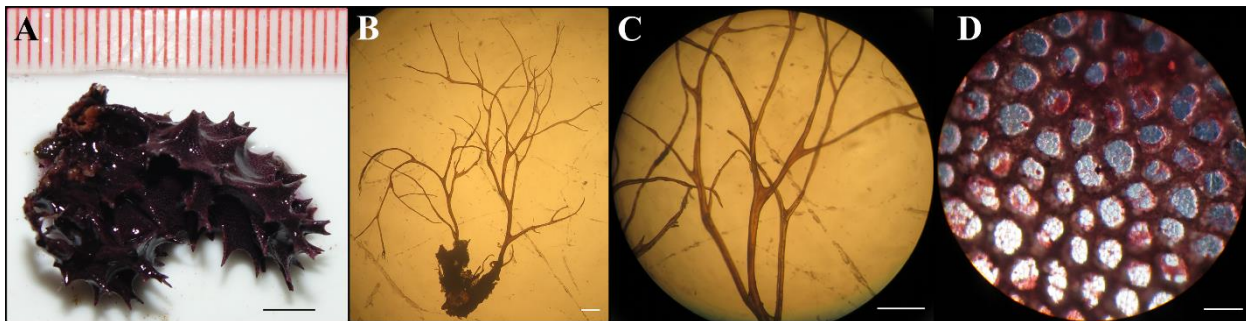

278

279 **Figure 2.** *Chelonaplysilla delicata* [ZSI/ANRC-14321]: (A) Freshly collected specimen, (B) Branching  
280 fibres and basal sponging plate, (C) Closer view of pigmented, branching, dendritic spongin fibre, (D)  
281 Inhalant pores surrounded by rounded meshes reinforced by sand grains . Scale (A) 5mm (B) 2 mm,  
282 (C) 2 mm, (D) 155  $\mu$ m.

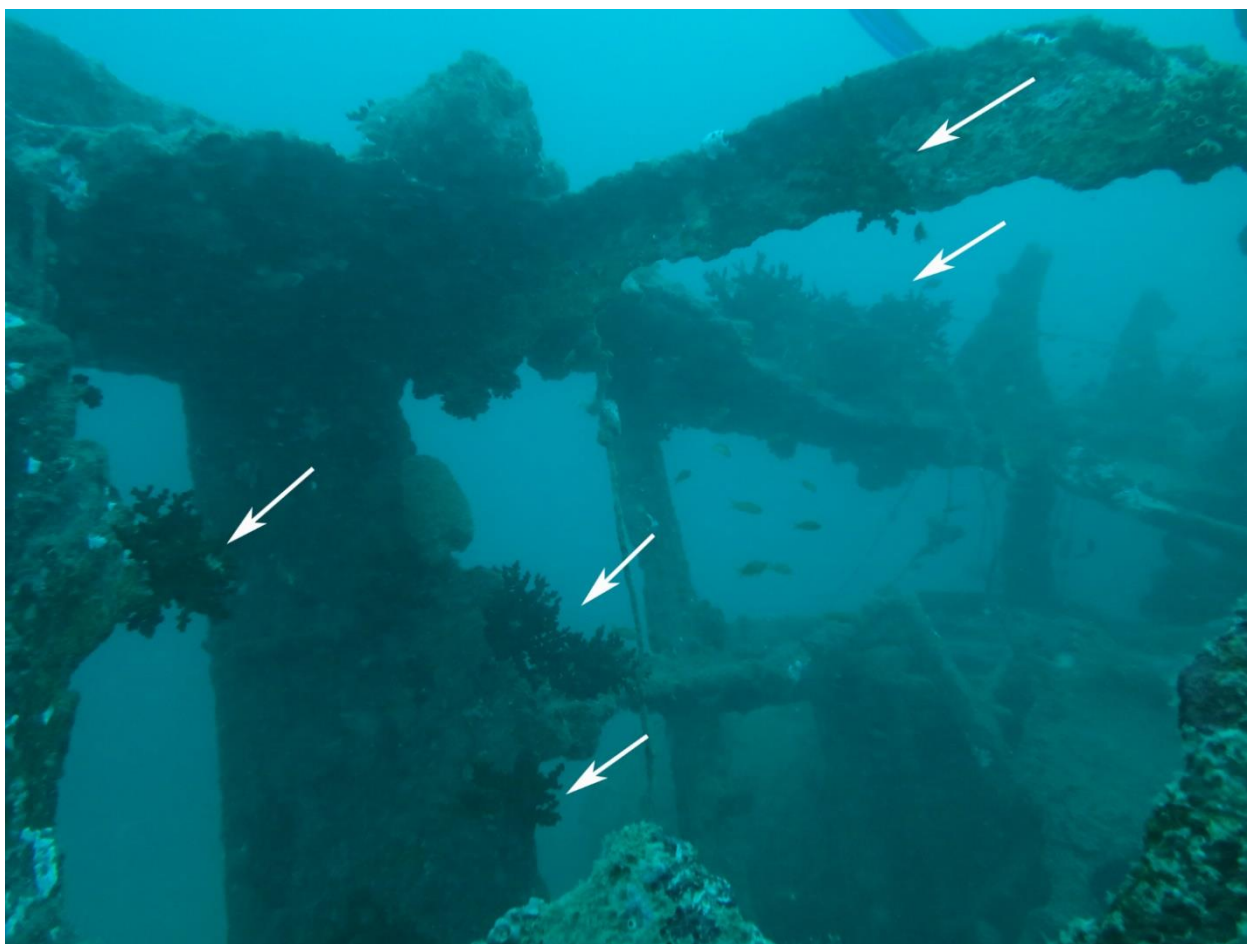

283

284 **Figure 3.** A part of the wreck HMIS SM. (Arrow: high abundance of invasive *Tubastrea* cf.  
285 *micranthus*)

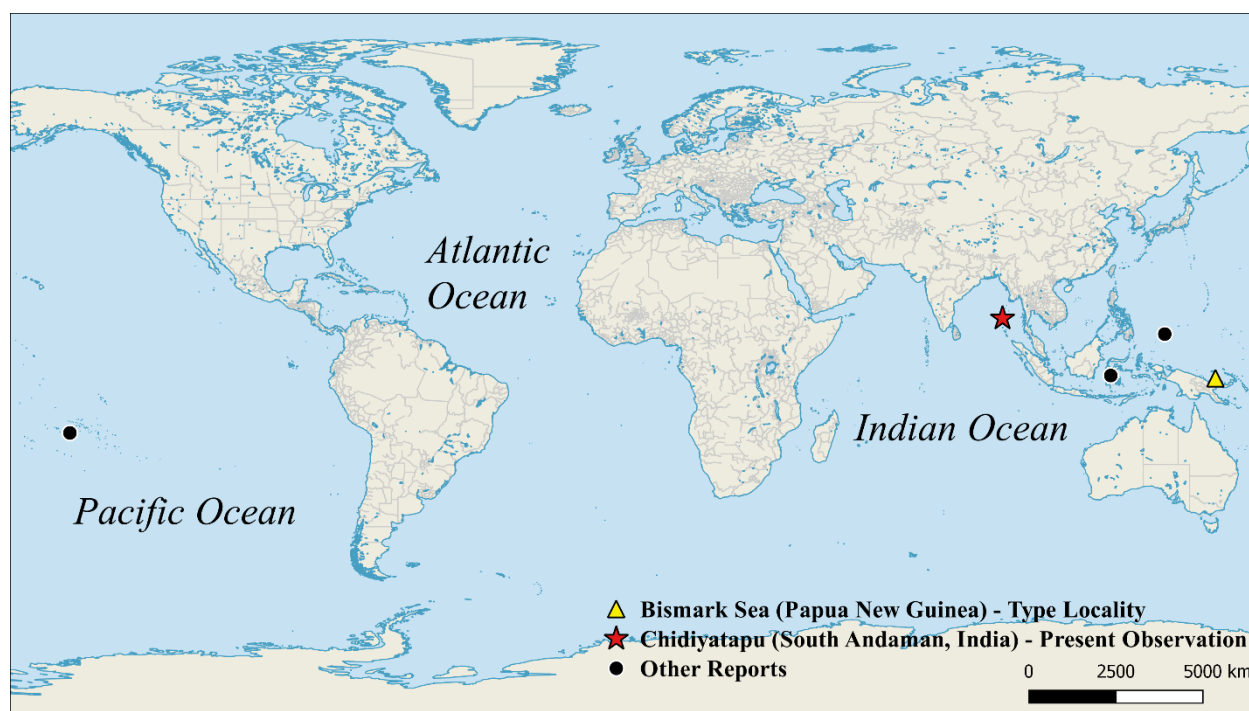

286

287 **Figure 4.** Global distribution of *C. delicata* Pulitzer-Finali & Pronzato, 1999

288



Table 1. Shipwrecks assessed in ANI

| <b>Wreck Name</b>        | <b>Co-ordinates</b>                          | <b>Location</b>                    | <b>Date of Sinking</b> | <b>Depth (m)</b> | <b>Current Activities</b> | <b>Reference</b>            |
|--------------------------|----------------------------------------------|------------------------------------|------------------------|------------------|---------------------------|-----------------------------|
| SS Inchkeith             | 12°00'23.69"N<br>92°46'08.34"E               | Kyd Island (South Andaman)         | 1955                   | 14               | Diving*                   | 28,29,31                    |
| <b>HMIS Sophie Marie</b> | <b>11°28'38.02"N</b><br><b>92°42'12.20"E</b> | <b>Chidiyatapu (South Andaman)</b> | <b>1942</b>            | <b>30 - 33</b>   | <b>Diving*</b>            | <b>29,31, Current Study</b> |
| MV Mars                  | 11°55'54.98"N<br>92°57'24.12"E               | Havelock (Ritchie's Archipelago)   | 2006                   | 10 - 16          | Diving*                   | 31                          |
| North Bay Wreck          | 11°43'00.56"N<br>92°45'60.60"E               | Port Blair (South Andaman)         | 30 – 40 (yrs)          | 10               | Diving* and Fishing       | 22,30                       |
| Peel Wreck               | 12°03'84.20"N<br>92°57'81.10"E               | Havelock (Ritchie's Archipelago)   | 8 - 10                 | 9 - 12.          | Diving*                   | 22,30                       |

|              |                                |                                     |         |    |                |       |
|--------------|--------------------------------|-------------------------------------|---------|----|----------------|-------|
| Japan Wreck  | 09°10'88.30"N<br>92°50'12.30"E | Car Nicobar (Nicobar<br>Islands)    | 40 - 50 | 28 | Fishing ground | 22,30 |
| Sinclair Bay | 11°39'873"N                    | Near Ross Island (South<br>Andaman) | -       | 8  |                | 22    |
| Shipwreck    | 92°45'488"E                    |                                     |         |    |                |       |

---

291 \*Recreational/Water Tourism

292

293

294

295

296
